# Supplementary material
Source: Springer Nature journal article supplement (https://www.springermedizin.de/resource/supplementary/12885_2011_2917_MOESM3_ESM.pdf/9462284)

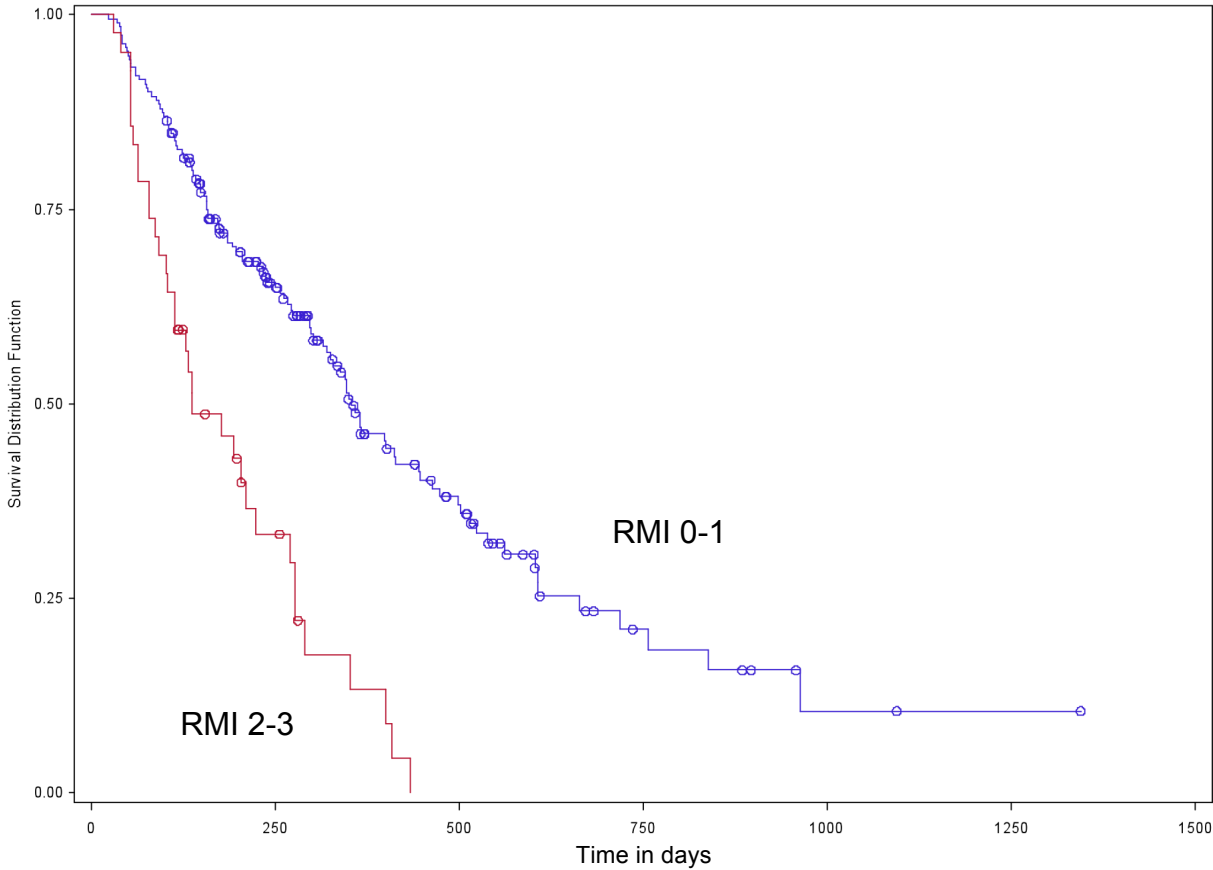

— RMI 0-1    ○ ○ ○ Censored RMI 0-1    — RMI 2-3    ○ ○ ○ Censored RMI 2-3

Supplement: MOESM3 [file 9462284]
